# Supplementary material for: Clustering Ensemble Technology Based on Granular Computing to Extract Cervical Cancer Predictors
Source: Hindawi journal article supplement (doi:10.1155/2022/4465007), 2022-05-26
Supplement: f1 [file 4465007.f1.docx]

Figure S1: Key genes screened by four methods
